# Supplementary material for: Impact of Dietary Crude Protein Level on Hepatic Lipid Metabolism in Weaned Female Piglets
Source: MDPI journal article supplement (doi:10.3390/ani11061829), 2021-06-18
Supplement: s1 [file s1]

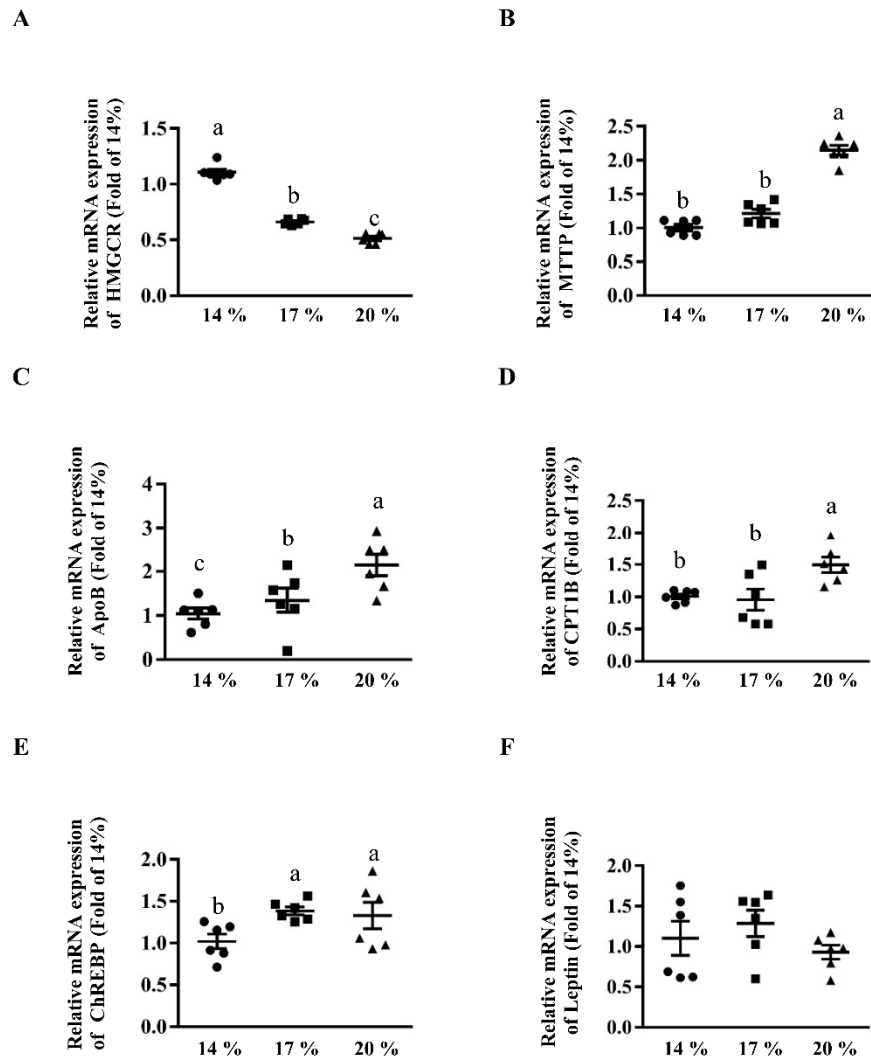

**Supplemental Figure S1.** Effects of dietary crude protein level on liver genes expression. HMGCR (A), MTTP (B), ApoB (C), CPT1B (D), ChREBP (E), and Leptin (F) mRNA abundance in liver weaned piglets fed different dietary crude protein. Values are means  $\pm$  SEMs,  $n = 6$ . Means without a common letter differ,  $P < 0.05$ . ApoB, Apolipoprotein B; ChREBP, Carbohydrate responsive element binding protein; CPT1B, Carnitine O-palmitoyltransferase 1; HMGCR, HMG-CoA Reductase; MTTP, Microsomal triglyceride transfer protein large subunit.

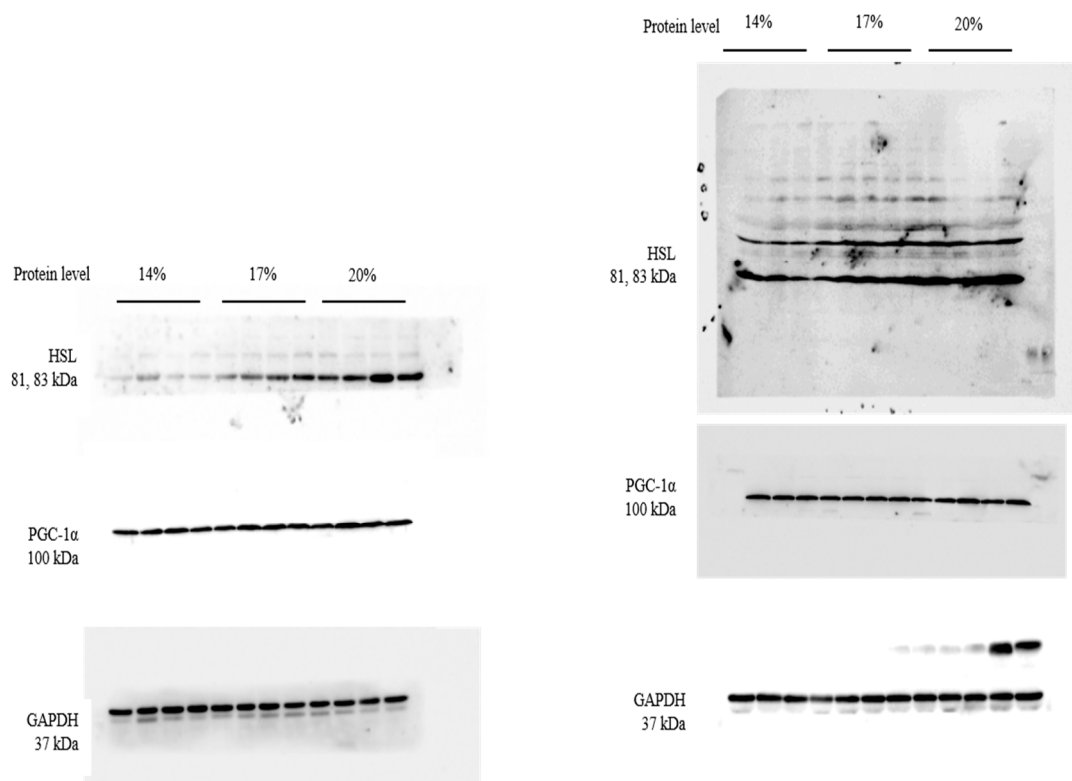

**Supplemental Figure S2.** Immunoblot analysis of Figure 3 AB

## Online Supporting Material

**Supplemental Table S1.** Primers used in supplemental Figure 1 for real-time PCR

| genes  | accession no.  | primers                                                            |
|--------|----------------|--------------------------------------------------------------------|
| ApoB   | KP641122.1     | F: 5'-GAGCAGTATTCAGCCAGCAC -3'<br>R: 5'-CCGACCATCATTGCCTTCTG -3'   |
| ChREBP | XM_013995540.2 | F: 5'-GTATGTGGAGCGGAGGAAGA -3'<br>R: 5'- CGCCACTTGTGGTATTCTCG -3'  |
| CPT1B  | NM_001007191.1 | F: 5'- CCCAATTCCAGATCCGCATG-3'<br>R: 5'-TGAGAACTTGCTGGAGACGT-3'    |
| HMGCR  | NM_001122988.1 | F: 5'- CTCAGCTCCAACTCACAGGA -3'<br>R: 5'- ACAAGAGCATCGAGGGTGAA -3' |
| Leptin | NM_213840.1    | F: 5'- GCTCCATCCTGTCCTGAGTT-3'<br>R: 5'-AAGGCAGACTGGTGAGGATC -3'   |
| MTTP   | NM_214185.1    | F: 5'-AGCCACCCCAAATCATCAGA -3'<br>R: 5'- GGTGGTCCCAGAGCTTAACT -3'  |
